# Supplementary material
Source: Springer Nature journal article supplement (https://www.springermedizin.de/resource/supplementary/13063_2011_954_MOESM2_ESM.pdf/9619220)

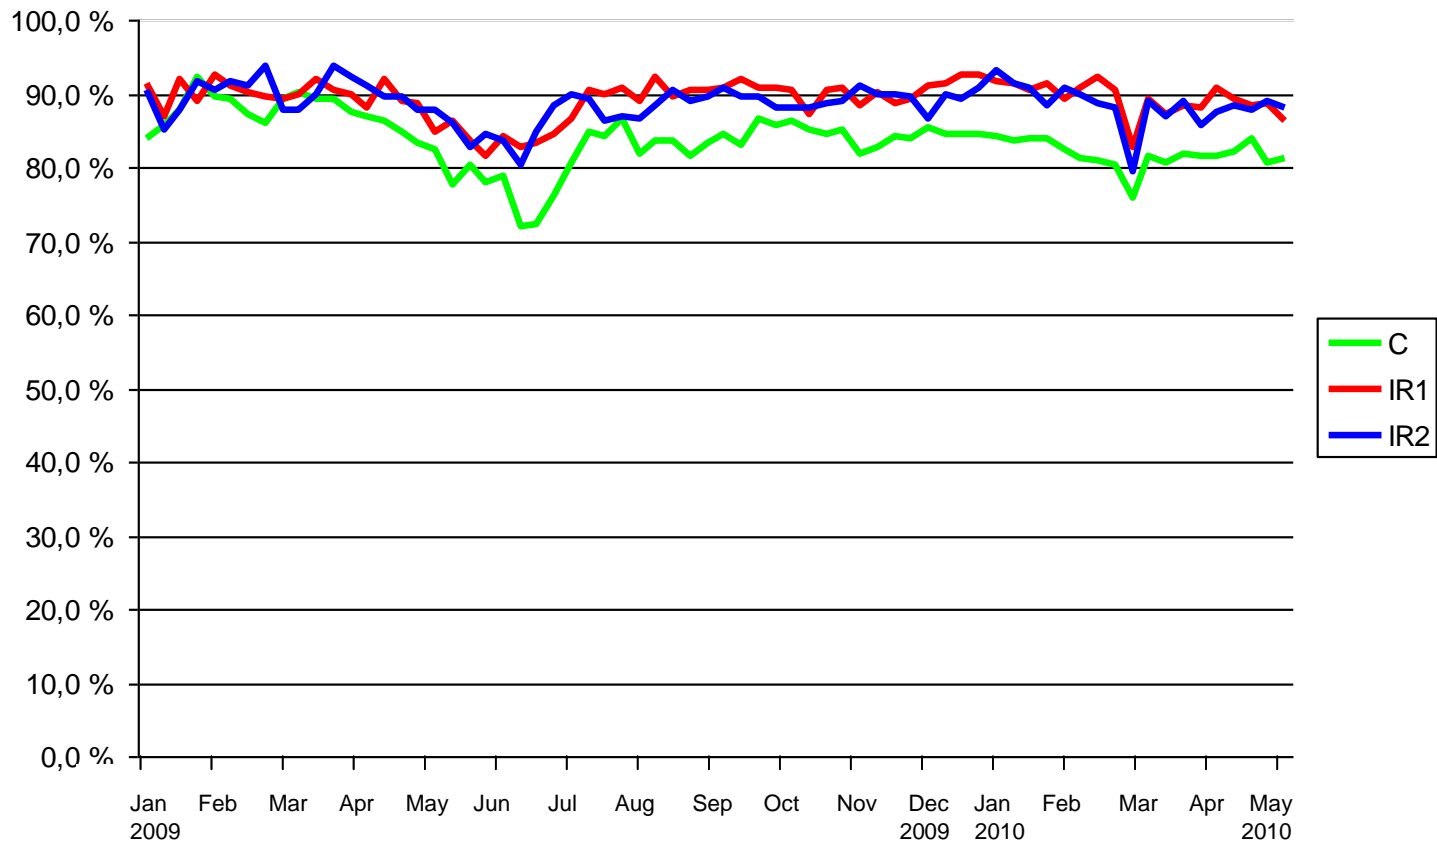

Supplement: MOESM2 [file 9619220]
